# Supplementary material for: Novel ‘main-part’ isostructuralism in metal complexes with 1-methylimidazole: crystal structures, energy calculations and magnetic properties
Source: Royal Society of Chemistry journal article supplement (doi:10.1039/d1dt03159g), 2021-01-01
Supplement: d1dt03159g1.pdf [file d1dt03159g1.pdf]

**Electronic Supplementary Information (ESI)**

**Figure S1.** IR spectra of 1-Melm (liquid) and complexes **1** and **2** in solid state.

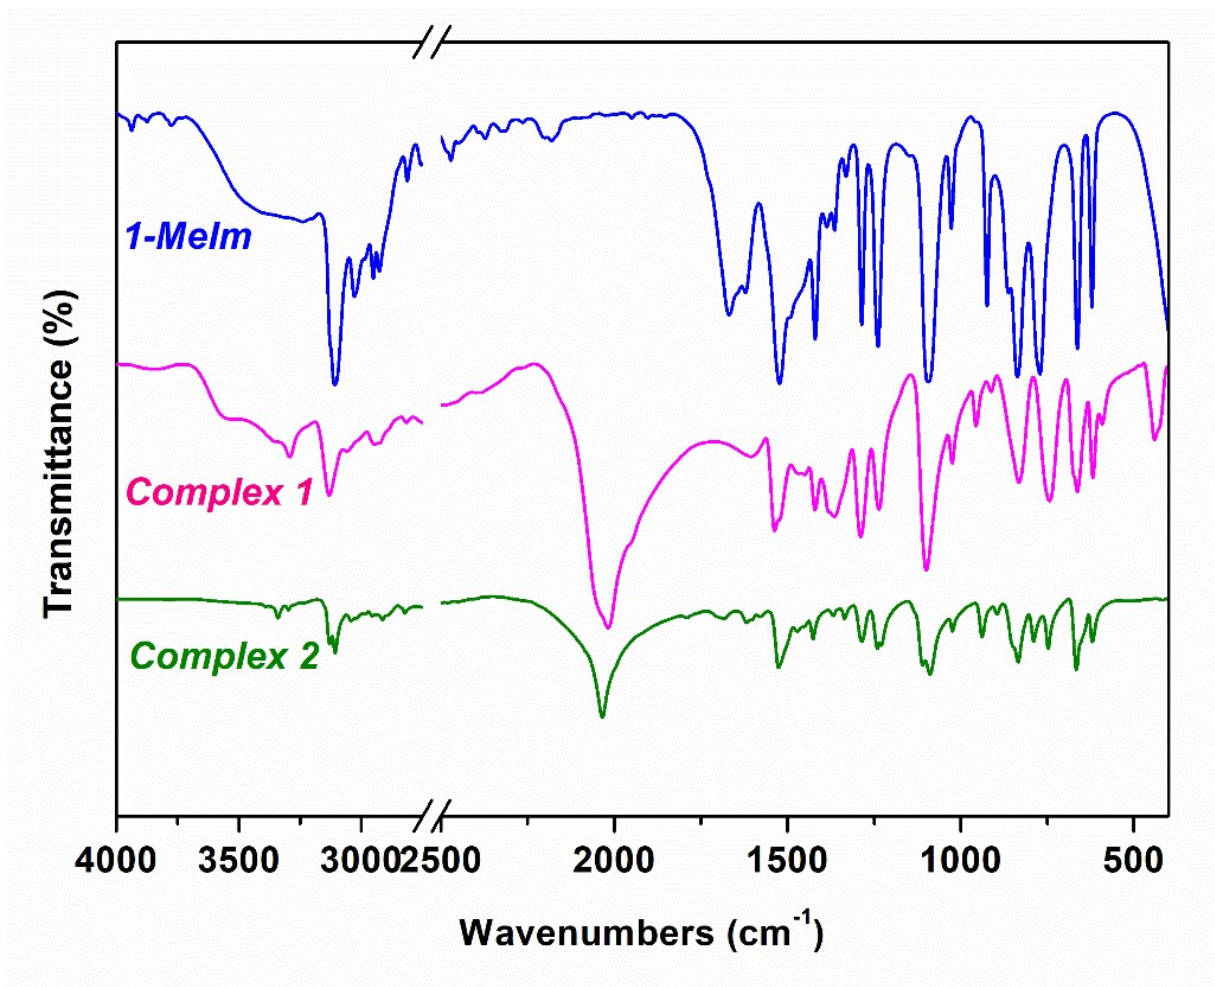

**Figure S2.** Raman spectra of 1-Melm (liquid) and complexes **1** and **2** in solid state.

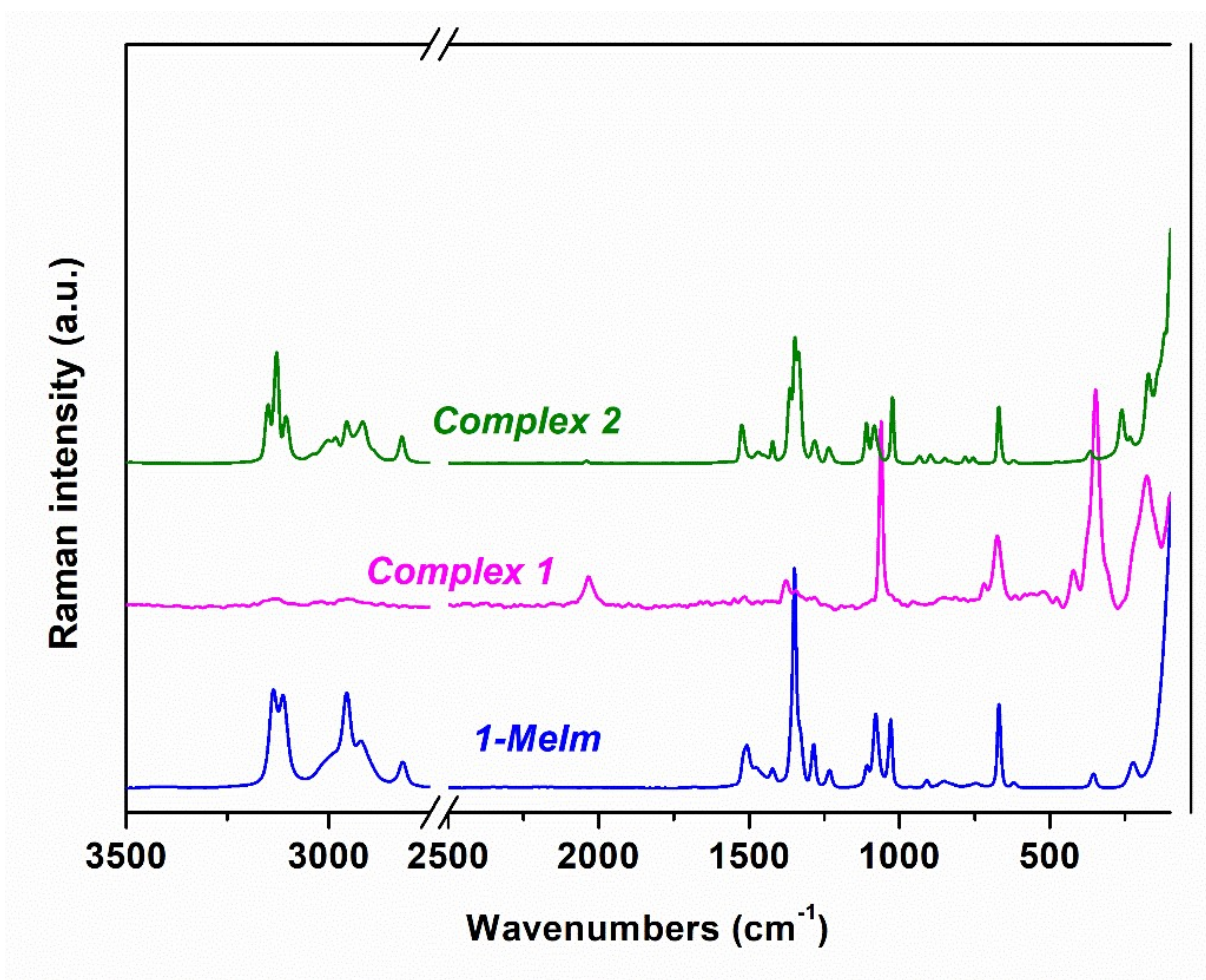

**Figure S3.** Electronic spectra (in acetonitrile) of complexes **1** and **2**.

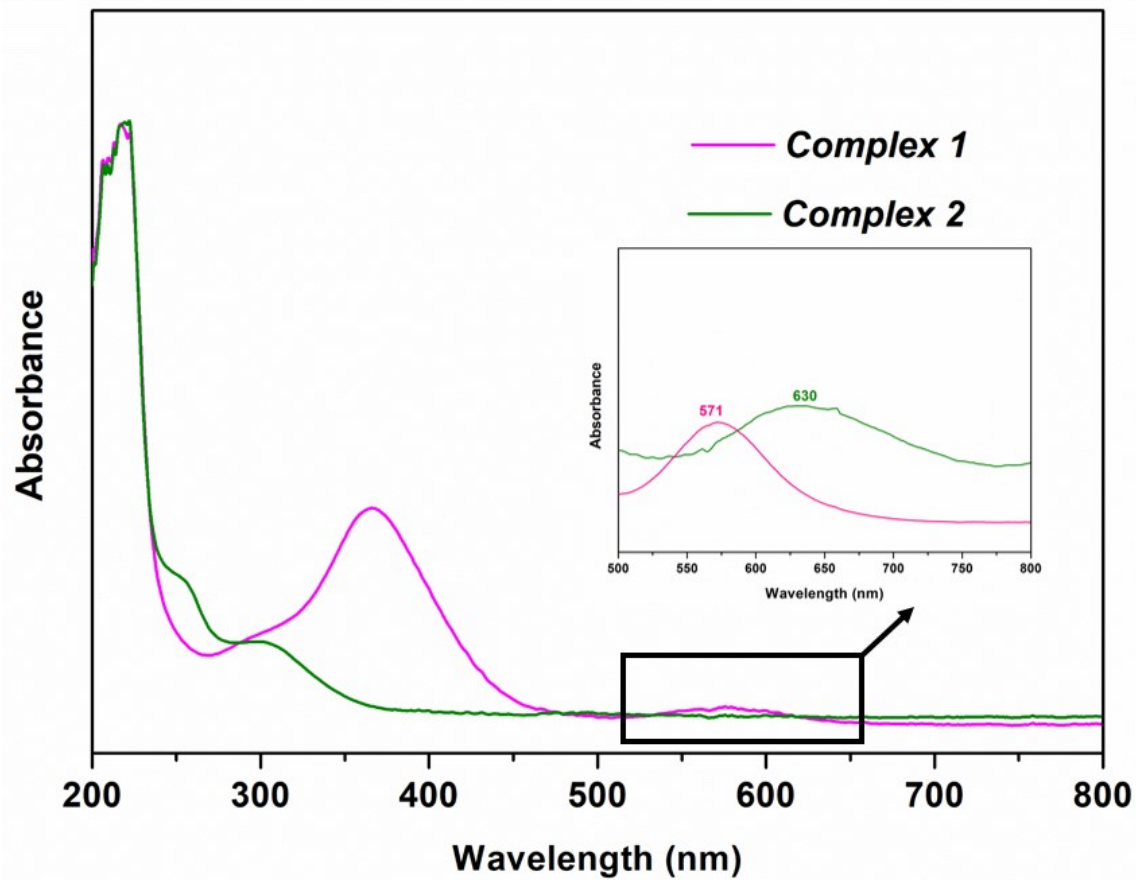

**Figure S4.** The temperature dependence for the effective magnetic moment ( $\mu_{\text{eff}}$ ).

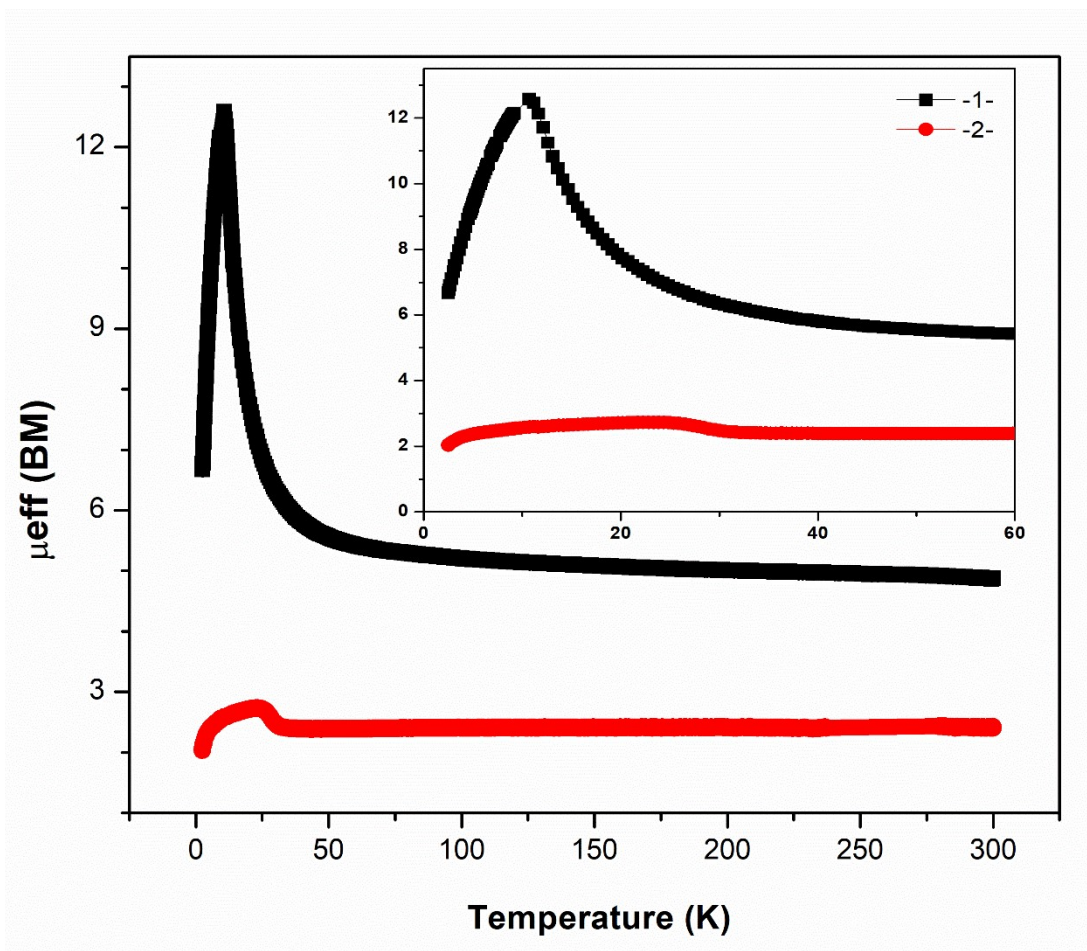



**Figure S5.** Plots of  $\chi^{-1}$  versus T for complexes **1** and **2**. Solid line is the best fit to the Curie-Weiss law.

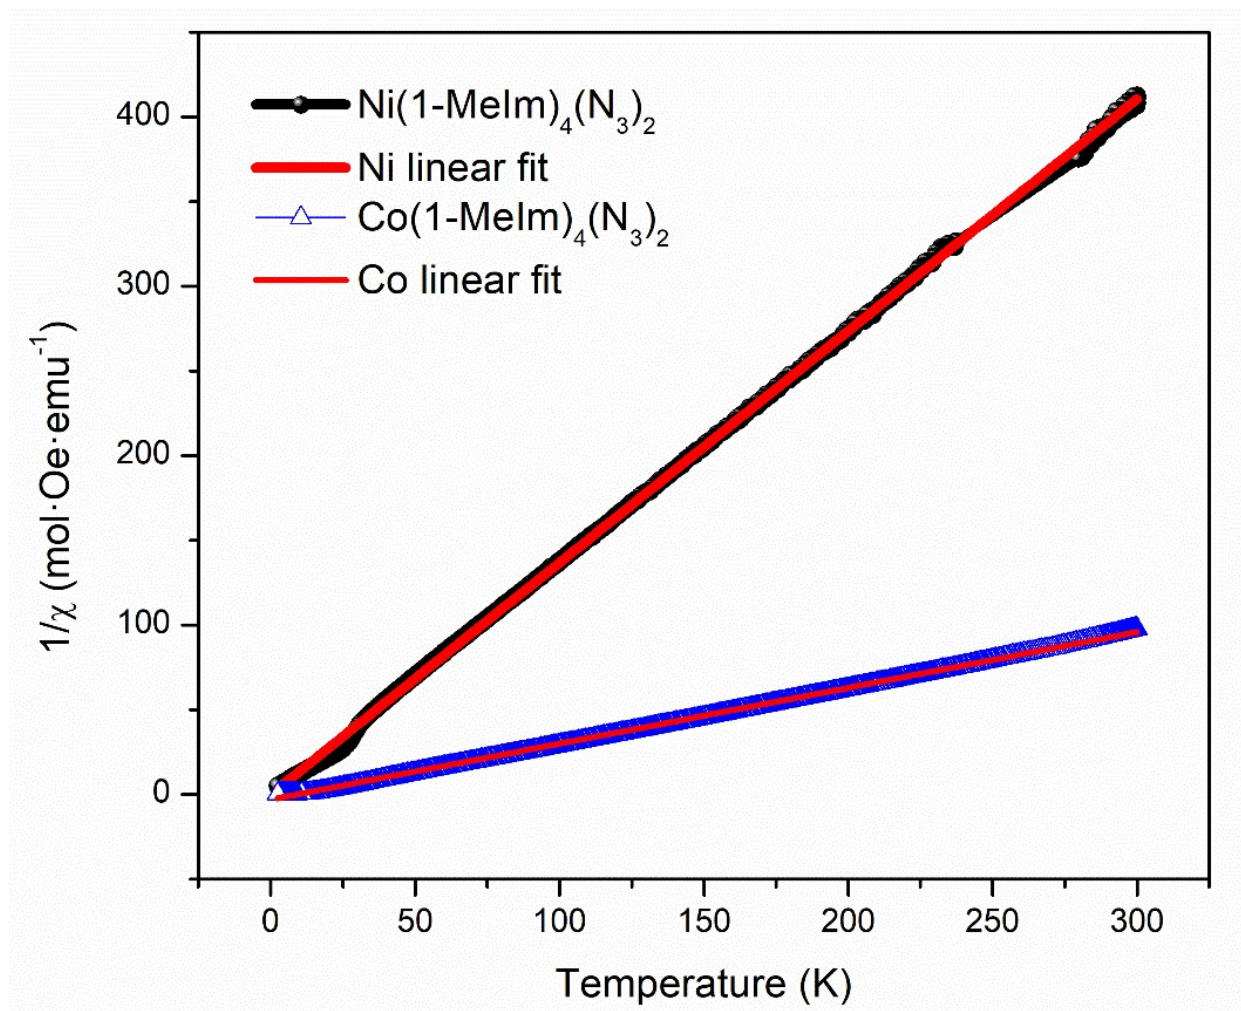

**Figure S6.** Types of H-bonded dimers extracted from the crystal structures of **1** (**Ia** and **Ib**) and **2** (**IIa** and **IIb**) and used for DFT calculations.

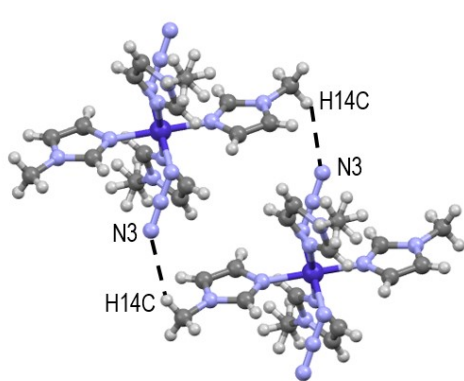

**Ia** –  $d(\text{Co}\cdots\text{Co}) = 7.909 \text{ \AA}$

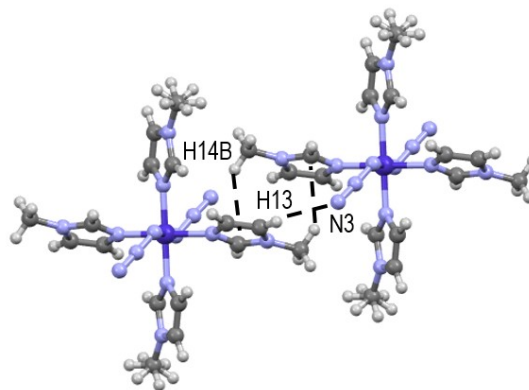

**Ib** –  $d(\text{Co}\cdots\text{Co}) = 9.172 \text{ \AA}$

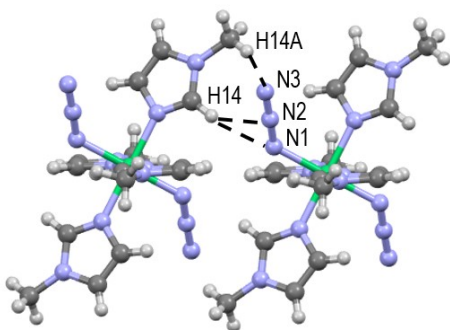

**IIa** –  $d(\text{Ni}\cdots\text{Ni}) = 6.917 \text{ \AA}$

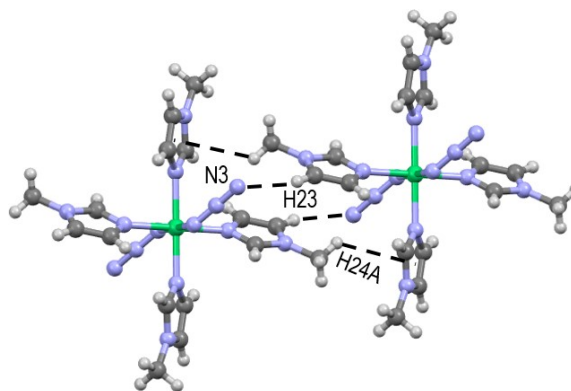

**IIb** –  $d(\text{Ni}\cdots\text{Ni}) = 9.275 \text{ \AA}$

**Figure S7.** In -phase  $\chi'$  and out-of-phase  $\chi''$  susceptibilities for complex **2**, no frequency dependence is observed.

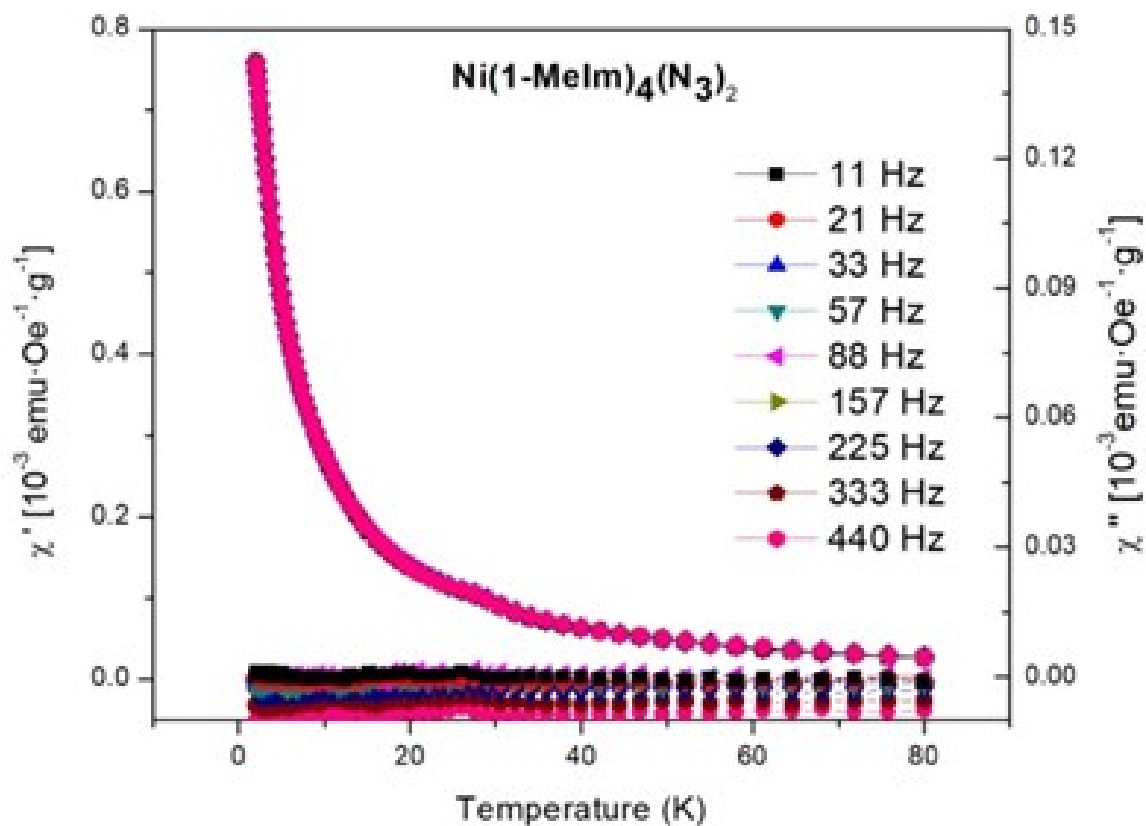

**Figure S8.** Magnetization versus Magnetic field measurements for complex **1** at different temperatures. Zoom in: non-null coercivity is evidenced below 15 K.

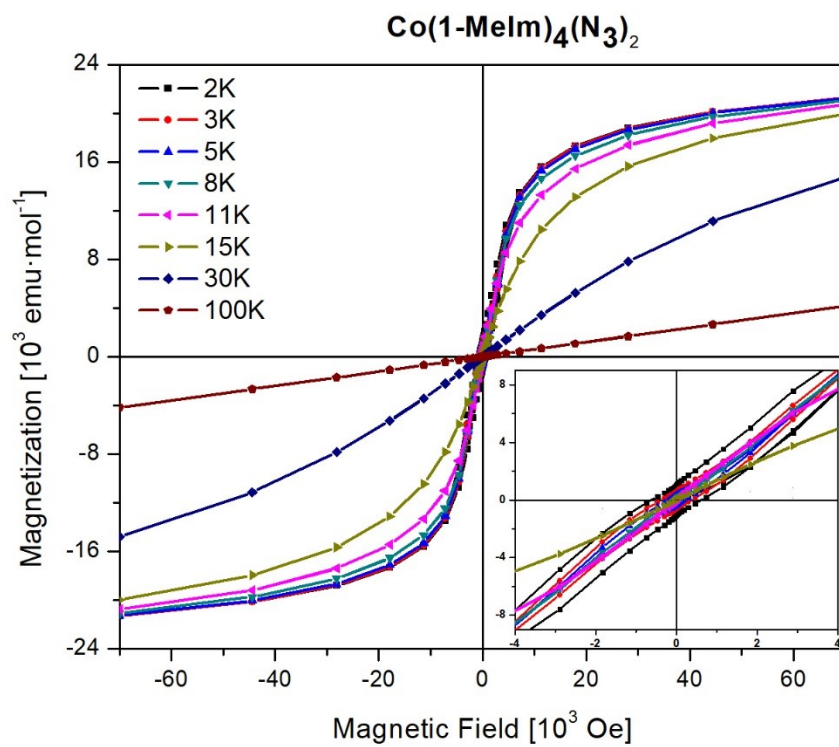



**Table S1a.** Atomic coordinates ( $\times 10^4$ ) and equivalent isotropic displacement parameters ( $\text{\AA}^2 \times 10^3$ ) for  $[\text{Co}(1\text{-Melm})_4(\text{N}_3)_2]$ .  $U(\text{eq})$  is defined as one third of the trace of the orthogonalized  $U^{ij}$  tensor.

| Atom  | x        | y         | z        | U(eq) |
|-------|----------|-----------|----------|-------|
| C(11) | 6312(3)  | 3800(3)   | 7788(3)  | 32(1) |
| C(12) | 6786(4)  | 6036(3)   | 7093(3)  | 39(1) |
| C(13) | 7423(4)  | 5553(4)   | 8358(3)  | 43(1) |
| C(14) | 7616(4)  | 3166(4)   | 10112(3) | 49(1) |
| C(21) | 3005(4)  | 8061(3)   | 6186(3)  | 39(1) |
| C(22) | 1153(3)  | 6829(4)   | 5947(4)  | 45(1) |
| C(23) | 162(4)   | 8195(4)   | 6502(4)  | 50(1) |
| C(24) | 885(5)   | 10522(4)  | 7261(5)  | 74(1) |
| N(1)  | 6263(3)  | 6540(2)   | 4018(2)  | 36(1) |
| N(2)  | 7242(3)  | 6381(2)   | 2806(3)  | 35(1) |
| N(3)  | 8184(4)  | 6319(3)   | 1646(3)  | 63(1) |
| N(11) | 6070(2)  | 4927(2)   | 6736(2)  | 30(1) |
| N(12) | 7129(3)  | 4131(3)   | 8796(2)  | 36(1) |
| N(21) | 2951(2)  | 6736(2)   | 5749(2)  | 30(1) |
| N(22) | 1344(3)  | 8982(3)   | 6653(3)  | 42(1) |
| Co    | 50005000 | 500027(1) |          |       |

**Table S1b.** Atomic coordinates ( $\times 10^4$ ) and equivalent isotropic displacement parameters ( $\text{\AA}^2 \times 10^3$ ) for  $[\text{Ni}(1\text{-Melm})_4(\text{N}_3)_2]$ .  $U(\text{eq})$  is defined as one third of the trace of the orthogonalized  $U^{ij}$  tensor.

| Atom  | x        | y          | z       | U(eq) |
|-------|----------|------------|---------|-------|
| C(11) | 1829(4)  | 7653(3)    | 8863(3) | 30(1) |
| C(12) | 4437(4)  | 8514(3)    | 9037(3) | 42(1) |
| C(13) | 3255(4)  | 9723(3)    | 8461(3) | 48(1) |
| C(14) | -96(6)   | 10060(4)   | 7715(5) | 56(1) |
| C(21) | 5935(4)  | 3620(3)    | 7134(3) | 34(1) |
| C(22) | 2748(4)  | 4153(3)    | 7798(3) | 32(1) |
| C(23) | 3106(4)  | 3543(3)    | 6540(3) | 35(1) |
| C(24) | 6233(6)  | 2416(5)    | 4898(4) | 55(1) |
| N(1)  | 7838(3)  | 5673(3)    | 8725(2) | 38(1) |
| N(2)  | 8182(3)  | 6408(3)    | 7478(3) | 37(1) |
| N(3)  | 8573(4)  | 7147(4)    | 6266(3) | 69(1) |
| N(11) | 3548(3)  | 7209(2)    | 9292(2) | 30(1) |
| N(12) | 1592(3)  | 9173(2)    | 8340(2) | 36(1) |
| N(21) | 4538(3)  | 4212(2)    | 8170(2) | 29(1) |
| N(22) | 5149(3)  | 3193(2)    | 6134(2) | 33(1) |
| Ni    | 50005000 | 1000027(1) |         |       |

**Table S2a.** Full bond lengths [Å] and angles [°] for [Co(1-Melm)<sub>4</sub>(N<sub>3</sub>)<sub>2</sub>].

---

|                   |            |                    |            |
|-------------------|------------|--------------------|------------|
| C(11)-N(11)       | 1.318(3)   | N(3)-N(2)-N(1)     | 175.9(3)   |
| C(11)-N(12)       | 1.343(3)   | C(11)-N(11)-C(12)  | 105.6(2)   |
| C(12)-C(13)       | 1.345(4)   | C(11)-N(11)-Co     | 127.58(17) |
| C(12)-N(11)       | 1.383(3)   | C(12)-N(11)-Co     | 126.81(19) |
| C(13)-N(12)       | 1.367(4)   | C(11)-N(12)-C(13)  | 106.9(2)   |
| C(14)-N(12)       | 1.460(3)   | C(11)-N(12)-C(14)  | 127.0(2)   |
| C(21)-N(21)       | 1.315(3)   | C(13)-N(12)-C(14)  | 126.1(2)   |
| C(21)-N(22)       | 1.338(3)   | C(21)-N(21)-C(22)  | 105.4(2)   |
| C(22)-C(23)       | 1.336(4)   | C(21)-N(21)-Co     | 127.16(17) |
| C(22)-N(21)       | 1.371(3)   | C(22)-N(21)-Co     | 127.40(18) |
| C(23)-N(22)       | 1.365(4)   | C(21)-N(22)-C(23)  | 106.9(2)   |
| C(24)-N(22)       | 1.468(4)   | C(21)-N(22)-C(24)  | 126.4(2)   |
| N(1)-N(2)         | 1.201(3)   | C(23)-N(22)-C(24)  | 126.7(2)   |
| N(1)-Co           | 1.961(2)   | N(11)-Co-N(11)#1   | 180.0      |
| N(2)-N(3)         | 1.150(3)   | N(11)-Co-N(21)#1   | 88.06(8)   |
| N(11)-Co          | 1.9504(19) | N(11)#1-Co-N(21)#1 | 91.94(8)   |
| N(21)-Co          | 1.9510(18) | N(11)-Co-N(21)     | 91.94(8)   |
| Co-N(11)#1        | 1.9504(19) | N(11)#1-Co-N(21)   | 88.06(8)   |
| Co-N(21)#1        | 1.9510(18) | N(21)#1-Co-N(21)   | 180.0      |
| Co-N(1)#1         | 1.961(2)   | N(11)-Co-N(1)      | 88.64(9)   |
|                   |            | N(11)#1-Co-N(1)    | 91.36(9)   |
| N(11)-C(11)-N(12) | 111.3(2)   | N(21)#1-Co-N(1)    | 92.33(8)   |
| C(13)-C(12)-N(11) | 109.1(3)   | N(21)-Co-N(1)      | 87.67(8)   |
| C(12)-C(13)-N(12) | 107.0(2)   | N(11)-Co-N(1)#1    | 91.36(9)   |
| N(21)-C(21)-N(22) | 111.3(2)   | N(11)#1-Co-N(1)#1  | 88.64(9)   |
| C(23)-C(22)-N(21) | 109.7(3)   | N(21)#1-Co-N(1)#1  | 87.67(8)   |
| C(22)-C(23)-N(22) | 106.8(2)   | N(21)-Co-N(1)#1    | 92.33(8)   |
| N(2)-N(1)-Co      | 122.94(16) | N(1)-Co-N(1)#1     | 180.0      |

---

Symmetry transformations used to generate equivalent atoms: (#1) -x+1, -y+1, -z+1.

**Table S2b.** Bond lengths [Å] and angles [°] for [Ni(1-Melm)<sub>4</sub>(N<sub>3</sub>)<sub>2</sub>].

---

|                    |            |                 |          |
|--------------------|------------|-----------------|----------|
| C(11)-N(11)        | 1.317(3)   | N(11)#1-Ni-N(1) | 89.11(8) |
| C(11)-N(12)        | 1.348(3)   | N(11)-Ni-N(1)   | 90.89(8) |
| C(12)-C(13)        | 1.342(4)   | N(1)#1-Ni-N(1)  | 180.0    |
| C(12)-N(11)        | 1.371(3)   |                 |          |
| C(13)-N(12)        | 1.367(4)   |                 |          |
| C(14)-N(12)        | 1.467(4)   |                 |          |
| C(21)-N(21)        | 1.318(3)   |                 |          |
| C(21)-N(22)        | 1.339(3)   |                 |          |
| C(22)-C(23)        | 1.353(4)   |                 |          |
| C(22)-N(21)        | 1.378(3)   |                 |          |
| C(23)-N(22)        | 1.369(3)   |                 |          |
| C(24)-N(22)        | 1.460(4)   |                 |          |
| N(1)-N(2)          | 1.184(3)   |                 |          |
| N(1)-Ni            | 2.129(2)   |                 |          |
| N(2)-N(3)          | 1.162(3)   |                 |          |
| N(11)-Ni           | 2.1196(18) |                 |          |
| N(21)-Ni           | 2.0969(19) |                 |          |
| Ni-N(21)#1         | 2.0970(19) |                 |          |
| Ni-N(11)#1         | 2.1196(18) |                 |          |
| Ni-N(1)#1          | 2.129(2)   |                 |          |
|                    |            |                 |          |
| N(11)-C(11)-N(12)  | 111.2(2)   |                 |          |
| C(13)-C(12)-N(11)  | 110.0(3)   |                 |          |
| C(12)-C(13)-N(12)  | 106.5(2)   |                 |          |
| N(21)-C(21)-N(22)  | 112.1(2)   |                 |          |
| C(23)-C(22)-N(21)  | 110.0(2)   |                 |          |
| C(22)-C(23)-N(22)  | 106.0(2)   |                 |          |
| N(2)-N(1)-Ni       | 126.68(17) |                 |          |
| N(3)-N(2)-N(1)     | 177.7(3)   |                 |          |
| C(11)-N(11)-C(12)  | 105.4(2)   |                 |          |
| C(11)-N(11)-Ni     | 131.24(17) |                 |          |
| C(12)-N(11)-Ni     | 123.01(17) |                 |          |
| C(11)-N(12)-C(13)  | 106.8(2)   |                 |          |
| C(11)-N(12)-C(14)  | 126.6(3)   |                 |          |
| C(13)-N(12)-C(14)  | 126.6(3)   |                 |          |
| C(21)-N(21)-C(22)  | 104.8(2)   |                 |          |
| C(21)-N(21)-Ni     | 126.58(17) |                 |          |
| C(22)-N(21)-Ni     | 128.64(17) |                 |          |
| C(21)-N(22)-C(23)  | 107.1(2)   |                 |          |
| C(21)-N(22)-C(24)  | 127.0(3)   |                 |          |
| C(23)-N(22)-C(24)  | 125.8(3)   |                 |          |
| N(21)-Ni-N(21)#1   | 180.0      |                 |          |
| N(21)-Ni-N(11)#1   | 87.83(7)   |                 |          |
| N(21)#1-Ni-N(11)#1 | 92.17(7)   |                 |          |
| N(21)-Ni-N(11)     | 92.17(7)   |                 |          |
| N(21)#1-Ni-N(11)   | 87.83(7)   |                 |          |
| N(11)#1-Ni-N(11)   | 180.00(10) |                 |          |
| N(21)-Ni-N(1)#1    | 88.55(8)   |                 |          |
| N(21)#1-Ni-N(1)#1  | 91.45(8)   |                 |          |
| N(11)#1-Ni-N(1)#1  | 90.89(8)   |                 |          |
| N(11)-Ni-N(1)#1    | 89.11(8)   |                 |          |
| N(21)-Ni-N(1)      | 91.45(8)   |                 |          |
| N(21)#1-Ni-N(1)    | 88.55(8)   |                 |          |

Symmetry transformations used to generate equivalent atoms: (#1) -x+1, -y+1, -z+2.

**Table S3a.** Anisotropic displacement parameters ( $\text{\AA}^2 \times 10^3$ ) for  $[\text{Co}(1\text{-Melm})_4(\text{N}_3)_2]$ . The anisotropic displacement factor exponent takes the form:  $-2p^2[h^2a^*U^{11} + \dots + 2hk a^* b^* U^{12}]$ .

| Atom  | U <sup>11</sup> | U <sup>22</sup> | U <sup>33</sup> | U <sup>23</sup> | U <sup>13</sup> | U <sup>12</sup> |
|-------|-----------------|-----------------|-----------------|-----------------|-----------------|-----------------|
| C(11) | 33(1)           | 31(2)           | 32(1)           | -5(1)           | -3(1)           | -9(1)           |
| C(12) | 46(2)           | 35(2)           | 43(2)           | 1(1)            | -16(1)          | -18(1)          |
| C(13) | 49(2)           | 45(2)           | 44(2)           | -4(1)           | -19(1)          | -19(1)          |
| C(14) | 54(2)           | 56(2)           | 35(2)           | 5(1)            | -15(1)          | -11(2)          |
| C(21) | 35(1)           | 35(2)           | 48(2)           | -11(1)          | -7(1)           | -7(1)           |
| C(22) | 33(1)           | 37(2)           | 66(2)           | -8(2)           | -8(1)           | -8(1)           |
| C(23) | 34(2)           | 42(2)           | 65(2)           | -8(2)           | -4(1)           | 2(1)            |
| C(24) | 77(2)           | 47(2)           | 92(3)           | -35(2)          | -27(2)          | 8(2)            |
| N(1)  | 44(1)           | 32(1)           | 33(1)           | -6(1)           | 1(1)            | -18(1)          |
| N(2)  | 37(1)           | 32(1)           | 40(1)           | -2(1)           | -6(1)           | -15(1)          |
| N(3)  | 66(2)           | 72(2)           | 47(2)           | -12(2)          | 15(1)           | -33(2)          |
| N(11) | 31(1)           | 29(1)           | 30(1)           | -5(1)           | -5(1)           | -9(1)           |
| N(12) | 35(1)           | 44(1)           | 28(1)           | 0(1)            | -9(1)           | -8(1)           |
| N(21) | 31(1)           | 28(1)           | 30(1)           | -3(1)           | -4(1)           | -7(1)           |
| N(22) | 45(1)           | 30(1)           | 47(2)           | -12(1)          | -10(1)          | 1(1)            |
| Co    | 30(1)           | 26(1)           | 26(1)           | -3(1)           | -4(1)           | -9(1)           |

**Table S3b.** Anisotropic displacement parameters ( $\text{\AA}^2 \times 10^3$ ) for  $[\text{Ni}(1\text{-Melm})_4(\text{N}_3)_2]$ . The anisotropic displacement factor exponent takes the form:  $-2p^2[h^2a^*U^{11} + \dots + 2hk a^* b^* U^{12}]$ .

| Atom  | U <sup>11</sup> | U <sup>22</sup> | U <sup>33</sup> | U <sup>23</sup> | U <sup>13</sup> | U <sup>12</sup> |
|-------|-----------------|-----------------|-----------------|-----------------|-----------------|-----------------|
| C(11) | 30(1)           | 27(1)           | 36(1)           | -8(1)           | -10(1)          | -2(1)           |
| C(12) | 35(2)           | 32(1)           | 60(2)           | -5(1)           | -16(1)          | -8(1)           |
| C(13) | 48(2)           | 29(2)           | 65(2)           | -5(2)           | -10(2)          | -8(1)           |
| C(14) | 55(2)           | 45(2)           | 71(2)           | -6(2)           | -34(2)          | 12(2)           |
| C(21) | 29(2)           | 37(1)           | 36(1)           | -9(1)           | -8(1)           | -3(1)           |
| C(22) | 29(1)           | 30(1)           | 38(1)           | -5(1)           | -11(1)          | 1(1)            |
| C(23) | 39(2)           | 32(1)           | 37(1)           | -3(1)           | -20(1)          | -3(1)           |
| C(24) | 65(2)           | 61(2)           | 39(2)           | -22(2)          | 0(2)            | -9(2)           |
| N(1)  | 25(1)           | 50(1)           | 39(1)           | -5(1)           | -7(1)           | -7(1)           |
| N(2)  | 26(1)           | 52(1)           | 40(1)           | -15(1)          | -8(1)           | -12(1)          |
| N(3)  | 73(2)           | 98(2)           | 39(1)           | 4(2)            | -14(1)          | -40(2)          |
| N(11) | 29(1)           | 26(1)           | 33(1)           | -5(1)           | -10(1)          | -1(1)           |
| N(12) | 35(1)           | 29(1)           | 42(1)           | -4(1)           | -12(1)          | 2(1)            |
| N(21) | 28(1)           | 30(1)           | 31(1)           | -7(1)           | -12(1)          | 1(1)            |
| N(22) | 39(1)           | 32(1)           | 27(1)           | -6(1)           | -6(1)           | -5(1)           |
| Ni    | 23(1)           | 29(1)           | 30(1)           | -7(1)           | -9(1)           | -1(1)           |

**Table S4a.** Hydrogen coordinates ( $\times 10^4$ ) and isotropic displacement parameters ( $\text{\AA}^2 \times 10^3$ ) for  $[\text{Co}(\text{1-Melm})_4(\text{N}_3)_2]$ .

| Atom   | x         | y        | z        | U(eq) |
|--------|-----------|----------|----------|-------|
| H(14A) | 72842215  | 1015373  |          |       |
| H(14B) | 69913716  | 1099973  |          |       |
| H(14C) | 88952931  | 1004873  |          |       |
| H(24A) | -40310932 | 7510110  |          |       |
| H(24B) | 137510431 | 8145110  |          |       |
| H(24C) | 138311211 | 6526110  |          |       |
| H(24D) | 197310784 | 7277110  |          |       |
| H(24E) | 19511285  | 6642110  |          |       |
| H(24F) | 18710505  | 8262110  |          |       |
| H(11)  | 5970(30)  | 2880(30) | 7880(30) | 28(6) |
| H(12)  | 6760(30)  | 7000(30) | 6470(30) | 41(7) |
| H(13)  | 7910(40)  | 6030(40) | 8920(40) | 58(9) |
| H(21)  | 4040(40)  | 8340(30) | 6210(30) | 45(8) |
| H(22)  | 800(30)   | 5890(40) | 5700(30) | 49(8) |
| H(23)  | -1070(40) | 8750(40) | 6670(40) | 62(9) |

**Table S4b.** Hydrogen coordinates ( $\times 10^4$ ) and isotropic displacement parameters ( $\text{\AA} \times 10^3$ ) for  $[\text{Ni}(\text{1-Melm})_4(\text{N}_3)_2]$ .

| Atom   | x        | y         | z        | U(eq)   |
|--------|----------|-----------|----------|---------|
| H(12)  | 5700(40) | 8470(30)  | 9320(30) | 42(7)   |
| H(13)  | 3410(40) | 10760(30) | 8220(30) | 52(8)   |
| H(14)  | 880(30)  | 7020(30)  | 8890(20) | 28(6)   |
| H(14A) | -870(60) | 9430(40)  | 7490(40) | 87(13)  |
| H(14B) | 370(60)  | 10650(40) | 6740(40) | 100(14) |
| H(14C) | -810(50) | 10790(50) | 8320(40) | 93(13)  |
| H(21)  | 7300(40) | 3490(30)  | 7070(20) | 30(7)   |
| H(22)  | 1450(40) | 4500(30)  | 8390(30) | 49(8)   |
| H(23)  | 2230(40) | 3420(30)  | 5940(30) | 58(9)   |
| H(24A) | 5720(50) | 2820(40)  | 4050(40) | 84(12)  |
| H(24B) | 6300(60) | 1380(50)  | 5200(40) | 105(15) |
| H(24C) | 7700(60) | 2630(40)  | 4670(40) | 97(13)  |
